# Supplementary material for: Detection of Lactobacillus delbrueckii subsp. bulgaricus and Streptococcus thermophilus in Inactivated Fermented Milk Using Fluorescence Quantitative Loop-Mediated Isothermal Amplification
Source: Hindawi journal article supplement (doi:10.1155/2024/8336100), 2024-03-18
Supplement: f1 [file 8336100.f1.zip]

Archive with 3 entries (3 files):
- Figure S1 (1).jpg
- Figure S2 (1).jpg
- Figure S3 (1).jpg
