# Supplementary figures and images for: Detection of Lactobacillus delbrueckii subsp. bulgaricus and Streptococcus thermophilus in Inactivated Fermented Milk Using Fluorescence Quantitative Loop-Mediated Isothermal Amplification
Source: Hindawi journal article supplement (doi:10.1155/2024/8336100), 2024-03-18

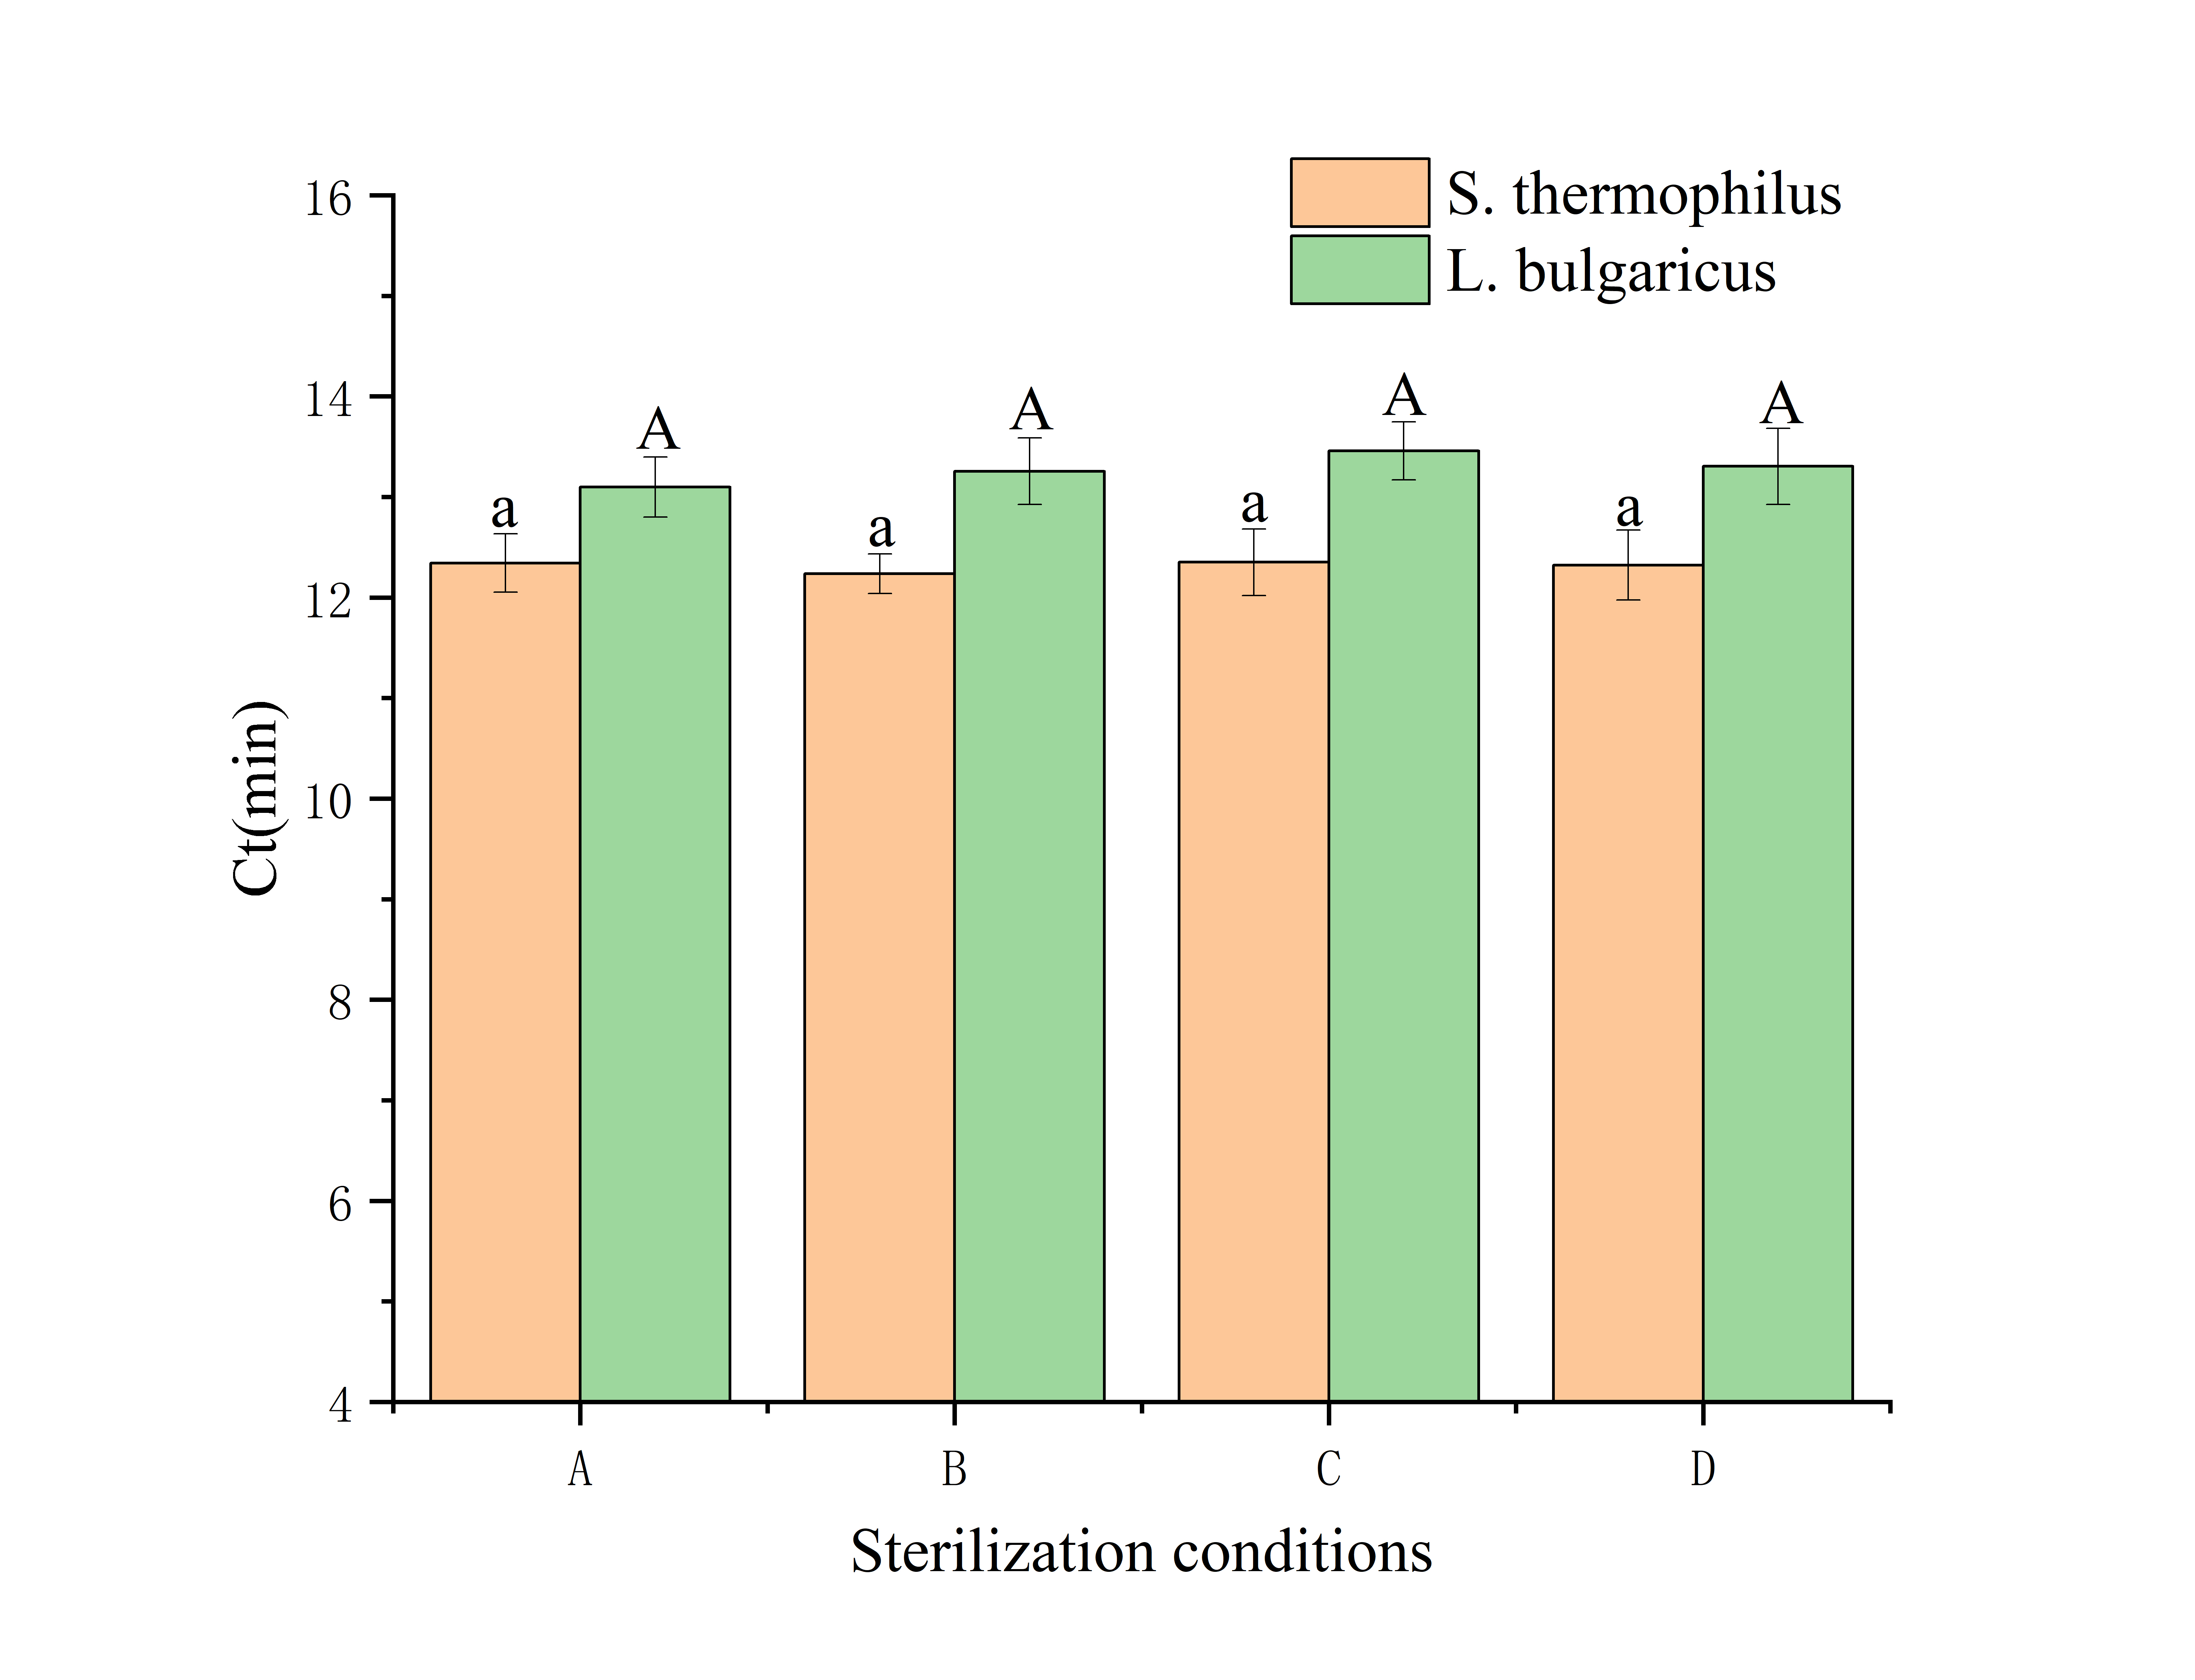

Supplement: f1 [file 8336100.f1.zip › Figure S1 (1).jpg]

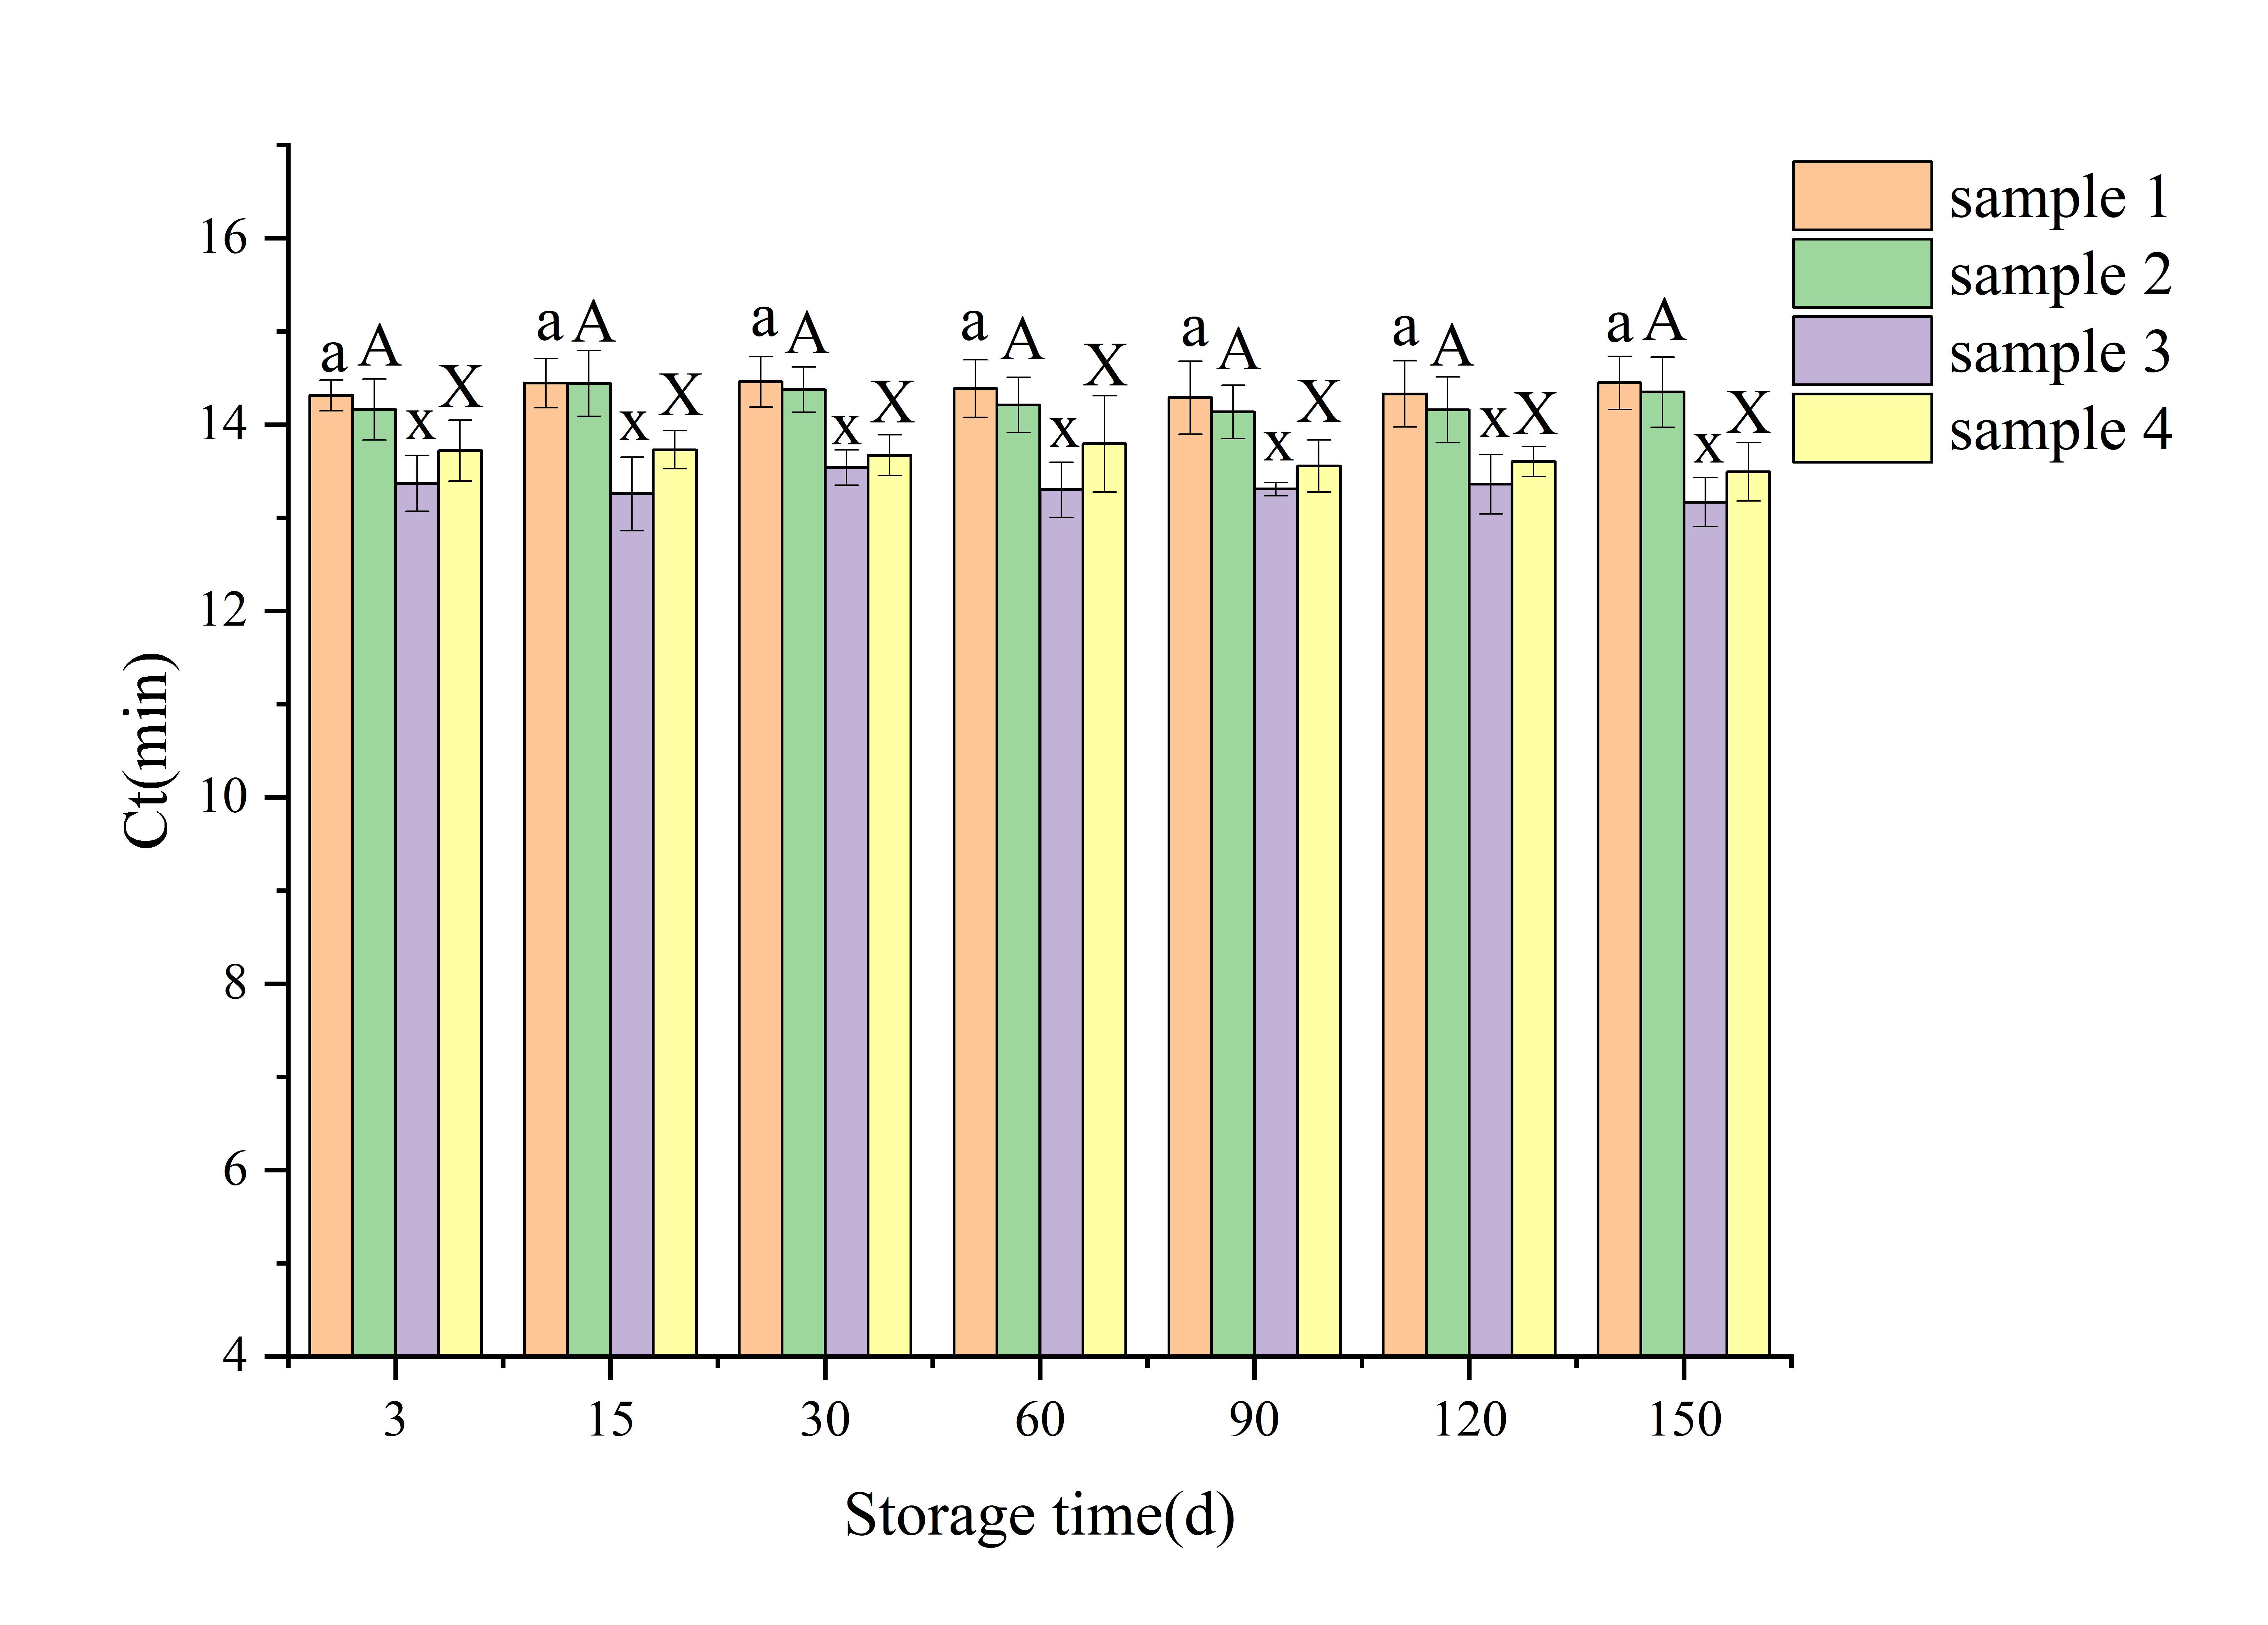

Supplement: f1 [file 8336100.f1.zip › Figure S2 (1).jpg]

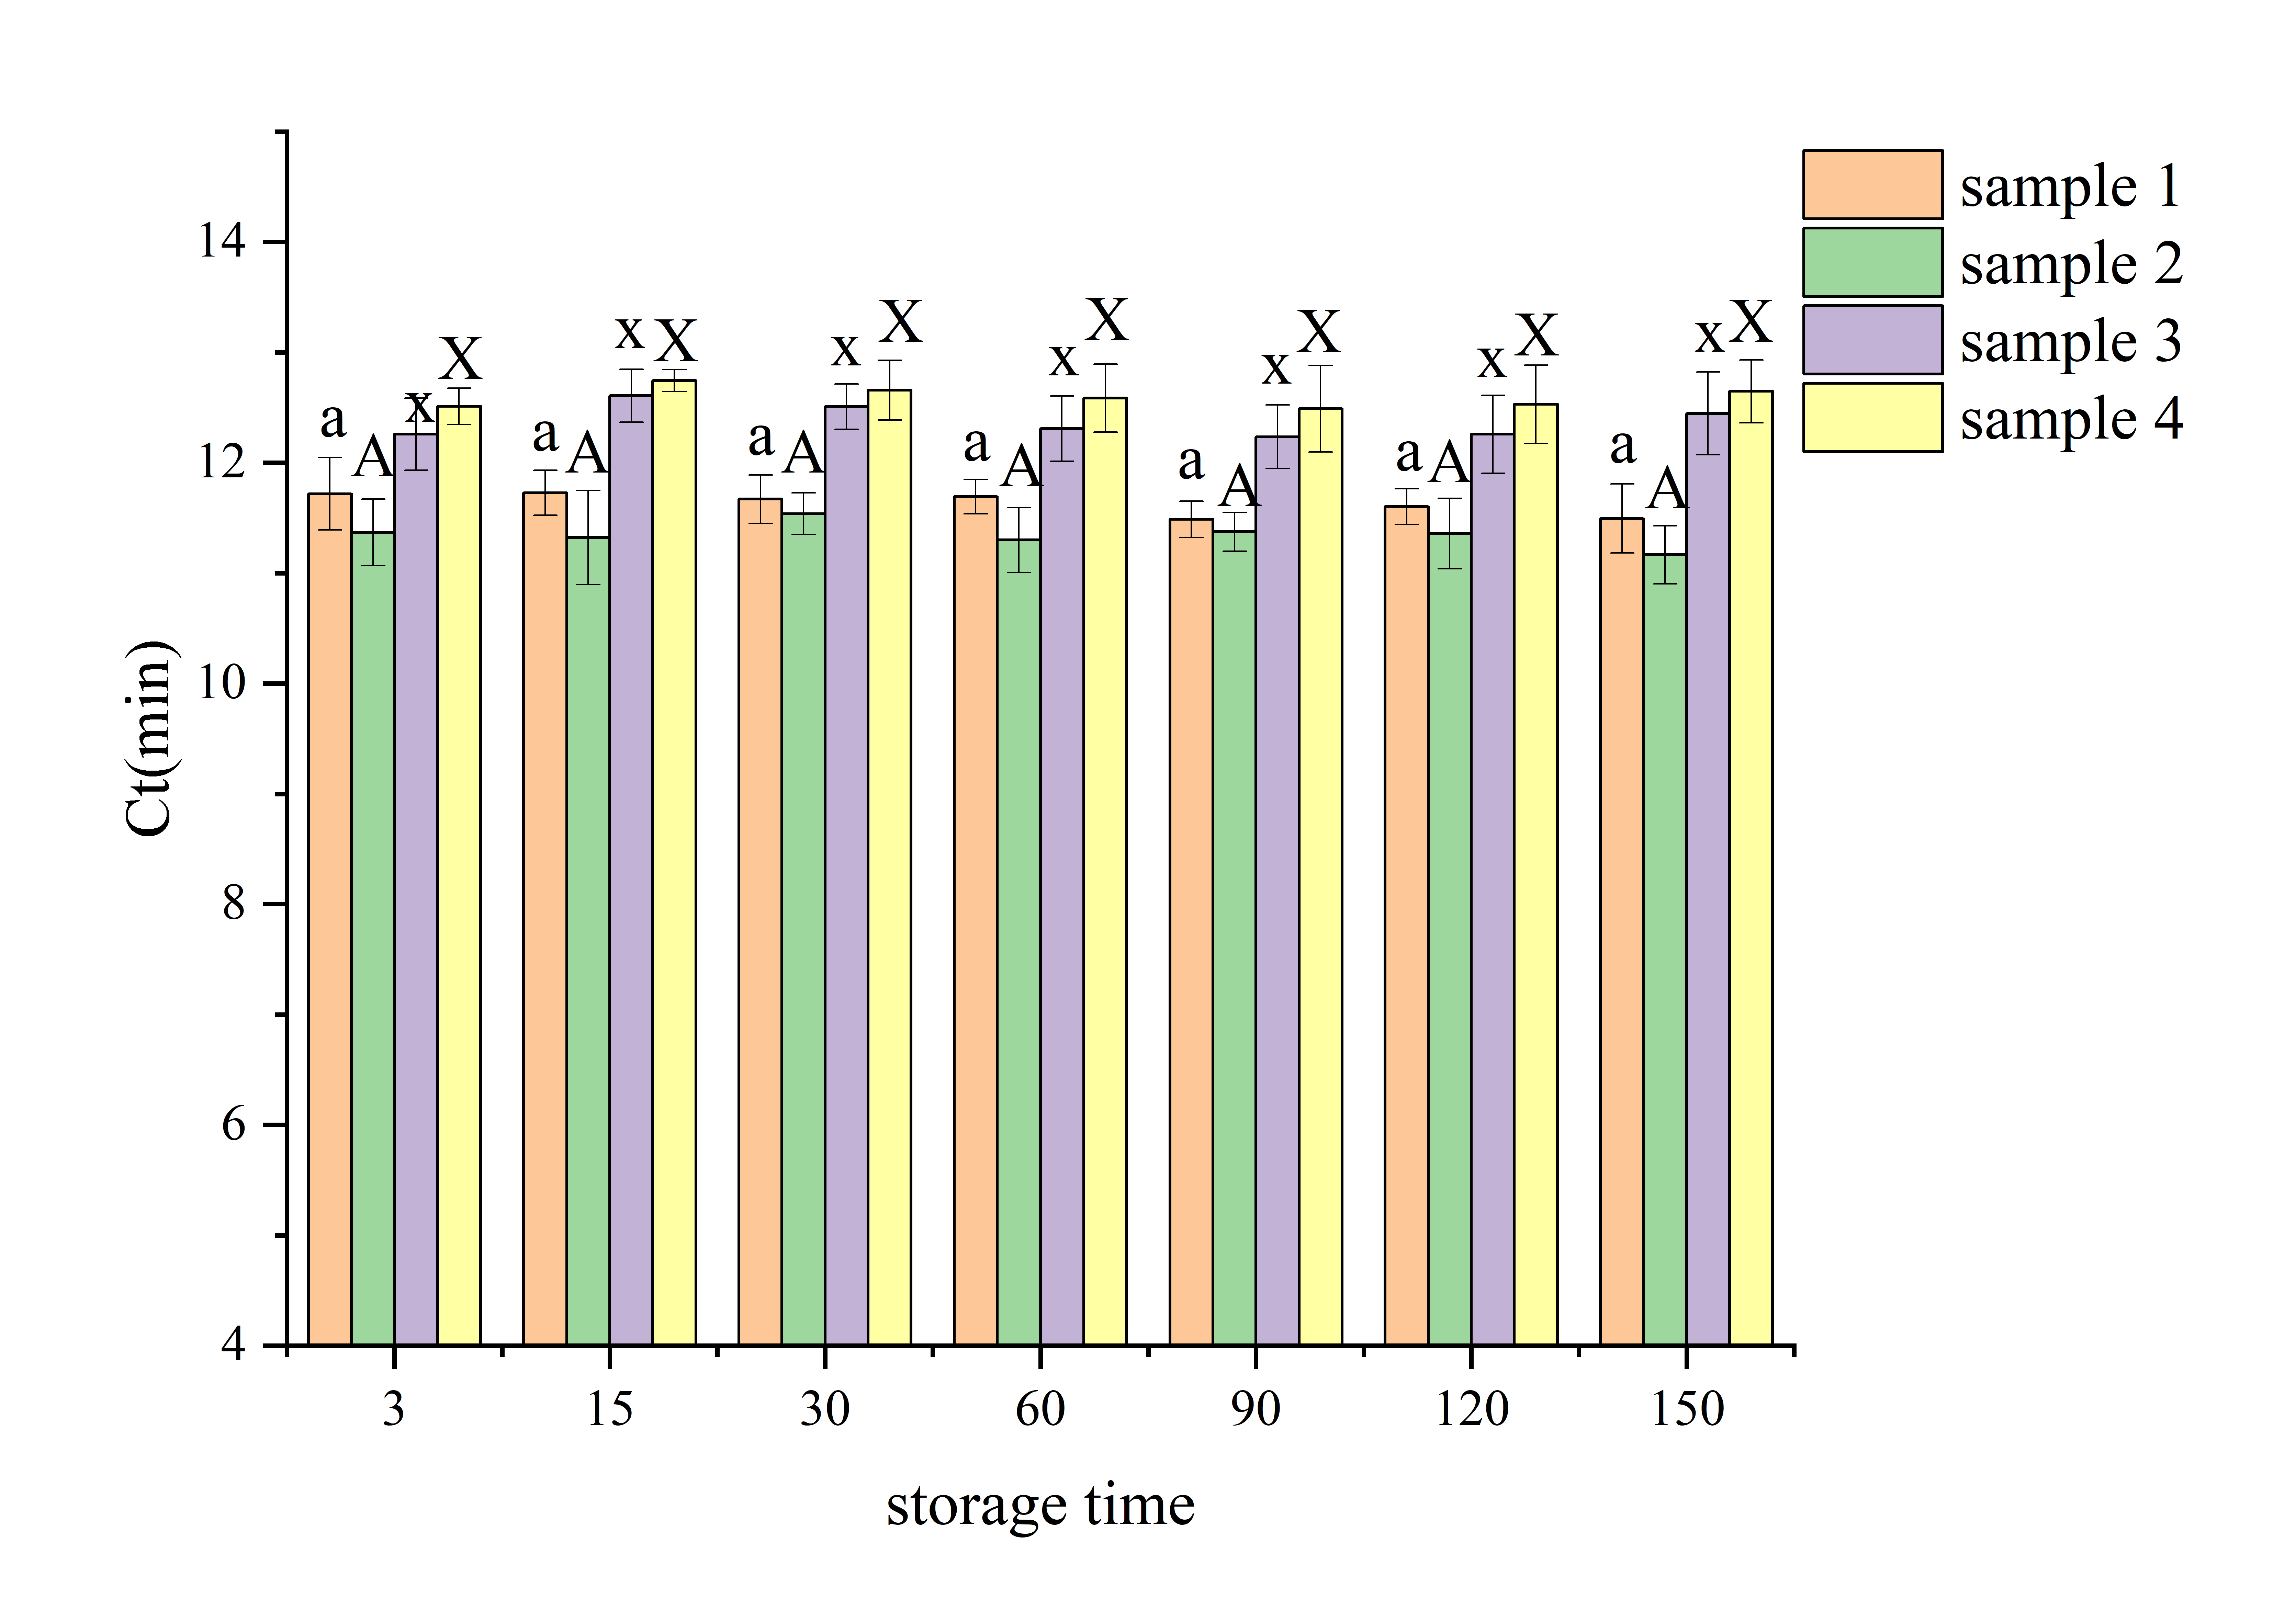

Supplement: f1 [file 8336100.f1.zip › Figure S3 (1).jpg]
